# Supplementary material
Source: MDPI journal article supplement (https://www.mdpi.com/2311-7524/9/3/310)

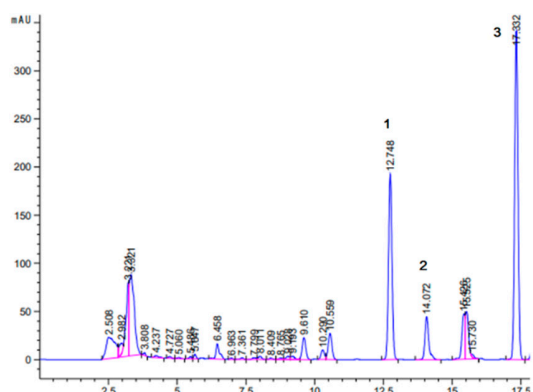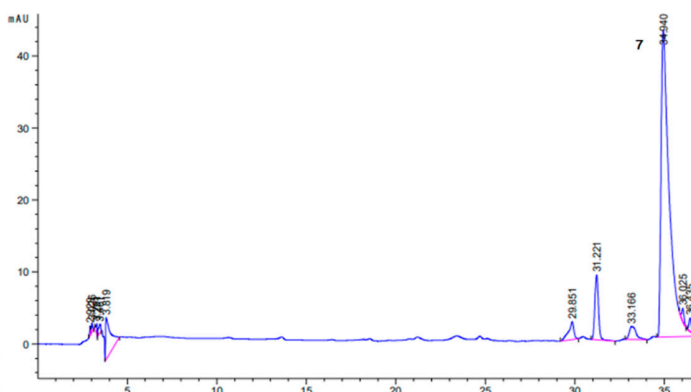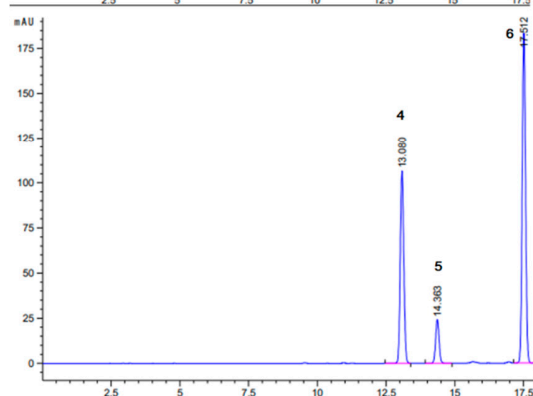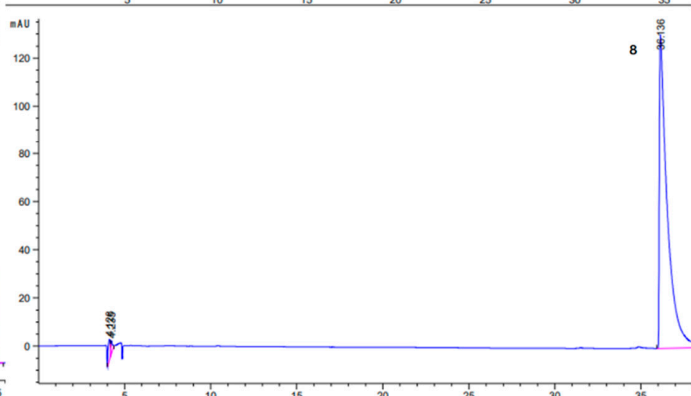

Supplement: s1 [file s1]
